# Supplementary material for: Label-free fibre optic Raman spectroscopy with bounded simplex-structured matrix factorization for the serial study of serum in amyotrophic lateral sclerosis
Source: Royal Society of Chemistry journal article supplement (doi:10.1039/d2an00936f), 2022-01-01
Supplement: d2an00936f1.pdf [file d2an00936f1.pdf]

| Wavenumber/wavenumber region (cm <sup>-1</sup> ) | Mode and wavenumber (cm <sup>-1</sup> )                | Assignment                                                                                                            |
|--------------------------------------------------|--------------------------------------------------------|-----------------------------------------------------------------------------------------------------------------------|
| 930-942                                          | M1, M4: 940; M2, M3: 938; M4: 940; M5: 930             | Protein (proline, α-helix) <sup>1, 2</sup>                                                                            |
| 950/952                                          | M2: 950; M3, M5: 952                                   | C-C stretch: protein (proline, valine, α-helix) <sup>3, 4</sup>                                                       |
| 999-1000                                         | M1, M4: 1000; M2, M3, M5: 999                          | Phenylalanine (breathing mode) <sup>5</sup>                                                                           |
| 1024-1027                                        | M1: 1027; M2, M3, M4: 1026; M5: 1024                   | Phenylalanine <sup>6-9</sup>                                                                                          |
| 1078/80/1100                                     | M1: 1078; M2, M3, M4: 1080; M4: 1100                   | Lipids <sup>4, 10-12</sup>                                                                                            |
| 1119-1124                                        | M1: 1123; M2: 1124, M3, M5: 1119; M4: 1122             | Proteins, lipids <sup>11, 13</sup>                                                                                    |
| 1153/5                                           | M1, M2, M5: 1153; M3, M4: 1155                         | Carbohydrates/carotenoids <sup>5, 14, 15</sup>                                                                        |
| 1172-1176                                        | M1: 1176; M3, M5: 1172; M4: 1174                       | Tyrosine <sup>11, 16</sup>                                                                                            |
| 1205                                             | M1-5                                                   | Tyrosine, phenylalanine <sup>2, 17</sup>                                                                              |
| 1240-1300                                        | M1: 1243; M4: 1247, M5: 1299                           | Proteins: amide III - 1243 β-sheet; 1266-1300 α-helix <sup>18</sup>                                                   |
| 1309-1321                                        | M1: 1321; M2: 1316; M3: 1309; M4: 1321                 | DNA/RNA, protein <sup>19</sup>                                                                                        |
| 1335/7                                           | M4: 1337; M5: 1335                                     | CH <sub>3</sub> CH <sub>2</sub> deformation, proteins/lipids <sup>20</sup>                                            |
| 1445-1450                                        | M1, M5: 1448; M2: 1446; M3: 1445; M4: 1450             | CH modes (CH <sub>2</sub> and CH <sub>3</sub> deformations: bending & scissoring) in proteins/lipids <sup>5, 21</sup> |
| 1520-5                                           | M2:1520; BSSMF-PCA: 1521; visit 1: 1523; visit 2: 1525 | Carotenoids <sup>22, 23</sup>                                                                                         |
| 1554/6                                           | M1, M2, M4: 1554; M3: 1556; M5: 1555                   | Tryptophan, proteins <sup>24, 25</sup>                                                                                |
| 1652/6                                           | M1, M3: 1656; M2: 1654; M4: 1653; M5: 1652             | Proteins (amide I) <sup>2, 26, 27</sup>                                                                               |

**Supplementary table 1. Tentative wavenumber assignments.**

| M1 | M2 | M3 | M4 | M5 | BSSMF- |
|----|----|----|----|----|--------|
|----|----|----|----|----|--------|

|          |                                               |                                                 |                                               |                                                |                                                | PCA                                           |
|----------|-----------------------------------------------|-------------------------------------------------|-----------------------------------------------|------------------------------------------------|------------------------------------------------|-----------------------------------------------|
| ALSFRS-R | <i>r</i> 0.03<br><i>p</i> 0.8                 | <i>r</i> 0.17<br><i>p</i> 0.17                  | <i>r</i> -0.11<br><i>p</i> 0.37               | <i>r</i> 0.09<br><i>p</i> 0.45                 | <b><i>R</i> -0.29</b><br><b><i>p</i> 0.01</b>  | <i>r</i> -0.19<br><i>p</i> 0.12               |
| DPR      | <i>r</i> -0.03<br><i>p</i> 0.8                | <b><i>r</i> -0.31</b><br><b><i>p</i> 0.01</b>   | <i>r</i> 0.12<br><i>p</i> 0.3                 | <i>r</i> 0.09<br><i>p</i> 0.48                 | <i>r</i> 0.21<br><i>p</i> 0.09                 | <i>r</i> 0.2<br><i>p</i> 0.1                  |
| FVC      | <b><i>r</i> -0.28</b><br><b><i>p</i> 0.02</b> | <b><i>r</i> 0.39</b><br><b><i>p</i> 0.001</b>   | <i>r</i> -0.12<br><i>p</i> 0.34               | <i>r</i> 0.19<br><i>p</i> 0.12                 | <b><i>r</i> -0.37</b><br><b><i>p</i> 0.002</b> | <b><i>r</i> -0.4</b><br><b><i>p</i> 0.001</b> |
| NfL      | <i>r</i> -0.1<br><i>p</i> 0.39                | <i>r</i> 0.04<br><i>p</i> 0.7                   | <i>r</i> -0.003<br><i>p</i> 0.9               | <i>r</i> 0.08<br><i>p</i> 0.5                  | <i>r</i> -0.04<br><i>p</i> 0.7                 | <i>r</i> -0.07<br>0.6                         |
| Ferritin | <i>r</i> 0.12<br><i>p</i> 0.3                 | <i>r</i> -0.04<br><i>p</i> 0.8                  | <i>r</i> 0.03<br><i>p</i> 0.8                 | <i>r</i> -0.15<br><i>p</i> 0.2                 | <i>r</i> 0.08<br><i>p</i> 0.5                  | <i>r</i> 0.1<br><i>p</i> 0.4                  |
| CRP      | <i>r</i> -0.03<br><i>p</i> 0.8                | <i>r</i> -0.2<br><i>p</i> 0.11                  | <i>r</i> 0.2<br><i>p</i> 0.11                 | <i>r</i> -0.19<br><i>p</i> 0.13                | <b><i>r</i> 0.37</b><br><b><i>p</i> 0.003</b>  | <b><i>r</i> 0.29</b><br><b><i>p</i> 0.02</b>  |
| C3       | <b><i>r</i> 0.28</b><br><b><i>p</i> 0.02</b>  | <b><i>r</i> -0.41</b><br><b><i>p</i> 0.0007</b> | <b><i>r</i> 0.39</b><br><b><i>p</i> 0.001</b> | <b><i>r</i> -0.32</b><br><b><i>p</i> 0.008</b> | <i>r</i> 0.18<br><i>p</i> 0.14                 | <b><i>r</i> 0.55</b><br><b>&lt;0.0001</b>     |
| C4       | <i>r</i> -0.05<br><i>p</i> 0.68               | <i>r</i> -0.17<br><i>p</i> 0.16                 | <i>r</i> 0.2<br><i>p</i> 0.1                  | <i>r</i> -0.02<br><i>p</i> 0.86                | <i>r</i> 0.06<br><i>p</i> 0.6                  | <i>r</i> 0.2<br><i>p</i> 0.11                 |

**Supplementary table 2.** Correlation of baseline BBSMF mode weights and clinical/biochemical markers of disease.

| Mode | PC1 coefficients |
|------|------------------|
| M1   | 0.1930           |
| M2   | -0.6114          |
| M3   | 0.6256           |
| M4   | -0.4003          |
| M5   | 0.1931           |

**Supplementary table 3.** PC1 coefficients.

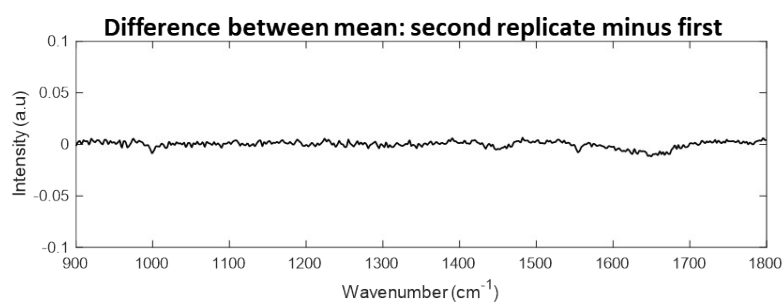

**Supplementary figure 1.** Difference between the mean plot for the technical replicates (2nd replicate minus the 1st).

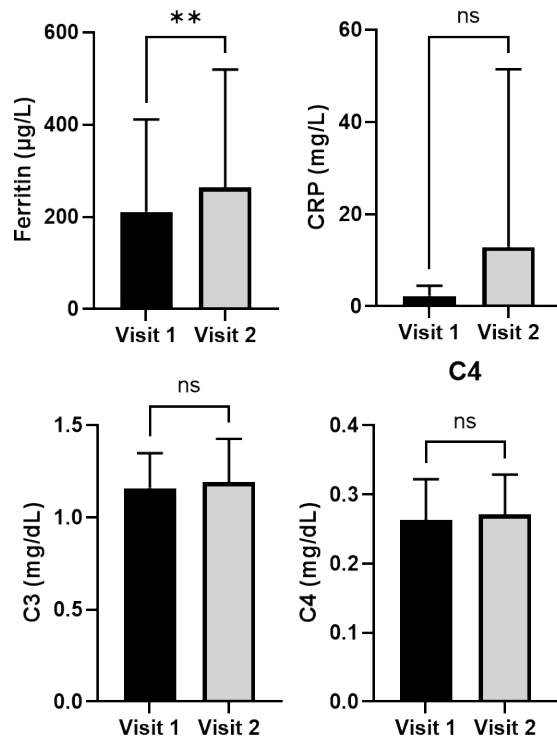

**Supplementary figure 2.** Changes between the two study visits for additional biochemical markers of disease.

## References

1. F. Bonnier and H. J. Byrne, *Analyst*, 2012, **137**, 322-332.
2. N. Stone, C. Kendall, J. Smith, P. Crow and H. Barr, *Faraday Discuss*, 2004, **126**, 141-157; discussion 169-183.
3. A. Plante, F. Dallaire, A.-A. Grosset, T. Nguyen, M. Birlea, J. Wong, F. Daoust, N. Roy, A. Kougioumoutzakakis, F. Azzi, K. Aubertin, S. Kadoury, M. Latour, R. Albadine, S. Prendeville, P. Boutros, M. Fraser, R. Bristow, T. Van Der Kwast, M. Orain, H. Brisson, N. Benzerdjeb, H. Hovington, A. Bergeron, Y. Fradet, B. Têtu, F. Saad, D. Trudel and F. Leblond, *Journal of Biomedical Optics*, 2021, **26**, 116501.
4. M. Gniadecka, H. C. Wulf, N. Nymark Mortensen, O. Faurskov Nielsen and D. H. Christensen, *Journal of Raman Spectroscopy*, 1997, **28**, 125-129.
5. N. Stone, C. Kendall, N. Shepherd, P. Crow and H. Barr, *Journal of Raman Spectroscopy*, 2002, **33**, 564-573.
6. L. M. Almehmadi, S. M. Curley, N. A. Tokranova, S. A. Tenenbaum and I. K. Lednev, *Scientific Reports*, 2019, **9**, 12356.
7. A. Stefanescu, V. Moisoiu, C. Bocsa, Z. Bálint, D.-T. Cosma, I. A. Veresiu, V. Chiş, N. Leopold and F. Elec, *Analyst*, 2018, **143**, 5372-5379.
8. Y. Yang, Y. Peng, C. Lin, L. Long, J. Hu, J. He, H. Zeng, Z. Huang, Z.-Y. Li, M. Tanemura, J. Shi, J. R. Lombardi and X. Luo, *Nano-Micro Letters*, 2021, **13**, 109.
9. R. A. Karaballi, S. Merchant, S. R. Power and C. L. Brosseau, *Physical Chemistry Chemical Physics*, 2018, **20**, 4513-4526.
10. X. Ren, K. Lin, C.-M. Hsieh, L. Liu, X. Ge and Q. Liu, *Biomed. Opt. Express*, 2022, **13**, 344-357.
11. Z. Huang, A. McWilliams, H. Lui, D. I. McLean, S. Lam and H. Zeng, *Int J Cancer*, 2003, **107**, 1047-1052.
12. V. O. Baron, M. Chen, B. Hammarstrom, R. J. H. Hammond, P. Glynn-Jones, S. H. Gillespie and K. Dholakia, *Communications Biology*, 2020, **3**, 236.
13. N. Huang, M. Short, J. Zhao, H. Wang, H. Lui, M. Korbelik and H. Zeng, *Opt Express*, 2011, **19**, 22892-22909.
14. D. K. R. Medipally, D. Cullen, V. Untereiner, G. D. Sockalingum, A. Maguire, T. N. Q. Nguyen, J. Bryant, E. Noone, S. Bradshaw, M. Finn, M. Dunne, A. M. Shannon, J. Armstrong, A. D. Meade and F. M. Lyng, *Therapeutic Advances in Medical Oncology*, 2020, **12**, 1758835920918499.
15. B. Mooij, B. J. A. Mooij, I. H. M. van Stokkum, G. R. Davies and F. Ariese, *Journal of Optics*, 2022.
16. A. Daniel, A. Prakasarao, B. David, L. Joseph, C. Murali Krishna, K. D and S. Ganesan, *Journal of Raman Spectroscopy*, 2014, **45**, 541-549.
17. J. De Gelder, K. De Gussem, P. Vandenabeele and L. Moens, *Journal of Raman Spectroscopy*, 2007, **38**, 1133-1147.
18. C. J. Kirkby, J. Gala de Pablo, E. Tinkler-Hundal, H. M. Wood, S. D. Evans and N. P. West, *Analyst*, 2021, **146**, 581-589.
19. A. C. S. Talari, Z. Movasaghi, S. Rehman and I. u. Rehman, *Applied Spectroscopy Reviews*, 2015, **50**, 46-111.
20. A. J. Ruiz-Chica, M. A. Medina, F. Sánchez-Jiménez and F. J. Ramírez, *Journal of Raman Spectroscopy*, 2004, **35**, 93-100.
21. L. Silveira, Jr., F. L. Silveira, B. Bodanese, R. A. Zangaro and M. T. Pacheco, *J Biomed Opt*, 2012, **17**, 077003.
22. F. E. R. Woods, S. Chandler, N. Sikora, R. Harford, A. Souriti, H. Gray, H. Wilkes, C. Lloyd-Bennett, D. A. Harris and P. R. Dunstan, *Clinical Spectroscopy*, 2022, **4**, 100020.
23. J. L. Gonzalez-Solis, J. C. Martinez-Espinosa, L. A. Torres-Gonzalez, A. Aguilar-Lemarroy, L. F. Jave-Suarez and P. Palomares-Anda, *Lasers Med Sci*, 2014, **29**, 979-985.

24. R. Gautam, S. Vanga, A. Madan, N. Gayathri, U. Nongthomba and S. Umapathy, *Anal Chem*, 2015, **87**, 2187-2194.
25. E. B. Carew, I. M. Asher and H. E. Stanley, *Science*, 1975, **188**, 933-936.
26. A. Mahadevan-Jansen and R. R. Richards-Kortum, *J Biomed Opt*, 1996, **1**, 31-70.
27. A. Mahadevan-Jansen, M. F. Mitchell, N. Ramanujam, A. Malpica, S. Thomsen, U. Utzinger and R. Richards-Kortum, *Photochem Photobiol*, 1998, **68**, 123-132.
